# Supplementary material
Source: bioRxiv or medRxiv preprint supplement (http://medrxiv.stage.highwire.org/highwire/filestream/95674/field_highwire_adjunct_files/2/2020.09.03.20181073-3.pdf)
Supplement: Supplementary file [file 2020.09.03.20181073-3.pdf]

| Patient ID                                | Phenotype                                                                                                                                                                                                                                                                                                                                                                | cWGS Molecular Diagnosis                                           | SOC Testing Method                             | Variant Detectable by SOC Methods?                 | Relevance of Diagnosis |
|-------------------------------------------|--------------------------------------------------------------------------------------------------------------------------------------------------------------------------------------------------------------------------------------------------------------------------------------------------------------------------------------------------------------------------|--------------------------------------------------------------------|------------------------------------------------|----------------------------------------------------|------------------------|
| <b>Diagnoses captured by cWGS and SOC</b> |                                                                                                                                                                                                                                                                                                                                                                          |                                                                    |                                                |                                                    |                        |
| 3CGS                                      | Congestive heart failure [HP:0001635], Hypertension [HP:0000822], Palpitations [HP:0001962], Left ventricular noncompaction cardiomyopathy [HP:0011664], Pulmonary hypertension [HP:0002092], Umbilical hernia [HP:0001537]                                                                                                                                              | Hypertrophic cardiomyopathy (OMIM: 608751)                         | Cardiomyopathy Panel                           | Yes                                                | Primary phenotype      |
| 18CGS                                     | Type II Diabetes Mellitus [HP: 0005978]                                                                                                                                                                                                                                                                                                                                  | MODY, Type 2 (OMIM: 125851)                                        | MODY Panel                                     | Yes                                                | Primary phenotype      |
| 29CGS                                     | Glucose intolerance [HP:0001952], Chronic recurrent multifocal osteomyelitis [HP:0005901], Pituitary adenoma [HP: 0002893]                                                                                                                                                                                                                                               | MODY, Type 2 (OMIM: 125851)                                        | MODY Panel                                     | Yes                                                | Primary phenotype      |
| 49CGS                                     | Pierre-Robin sequence [HP:0000201], Malar flattening [HP:0000272], Cleft palate [HP:0000175], Myopia [HP:0000545], Retinal detachment [HP:0000541], Hearing Impairment [HP:0000365], Abnormal joint morphology [HP:00001367], Delayed gross motor development [HP:0002194], Attention deficit disorder [HP:0007018], Anxiety [HP:0000739], Depression [HP:0000716]       | Stickler syndrome (OMIM: 108300)                                   | Stickler Panel                                 | Yes                                                | Primary phenotype      |
| 61CGS                                     | Aborted sudden cardiac death [HP:0031628]                                                                                                                                                                                                                                                                                                                                | Brugada/Long QT syndrome (OMIM: 600163)                            | Arrhythmia Panel                               | Yes                                                | Primary phenotype      |
| 92CGS                                     | Maternal Diabetes [HP:0009800], Glucose intolerance [HP:0001952]                                                                                                                                                                                                                                                                                                         | MODY, Type 2 (OMIM: 125851)                                        | MODY Panel                                     | Yes                                                | Primary phenotype      |
| 99CGS                                     | Cardiomyopathy [HP:0001638], Atrial fibrillation [HP:0005110], Ventricular tachycardia [HP:0004756], Syncope [HP:0001279]                                                                                                                                                                                                                                                | Dilated Cardiomyopathy (OMIM: 604145)                              | Cardiomyopathy Panel                           | Yes                                                | Primary phenotype      |
| 103CGS                                    | Mitral valve prolapse [HP:0001634], Aneurysm of an abdominal artery [HP:0002636], Pulmonary arteriovenous malformation [HP:0006548], Gastroesophageal reflux [HP:0002020], Hyperlipidemia [HP:0003077]                                                                                                                                                                   | Ehlers-Danlos syndrome, vascular type (OMIM: 130050)               | Aortopathy Panel                               | Yes                                                | Primary phenotype      |
| 120CGS                                    | Palpitations [HP:0001962], Prolonged QT interval [HP:0001657], Attention deficit disorder [HP:0007018], Anxiety [HP:0000739], Orthostatic hypotension [HP:0001278]                                                                                                                                                                                                       | Long QT syndrome (OMIM: 192500)                                    | Aortopathy Panel                               | Yes                                                | Primary phenotype      |
| 152CGS                                    | Nystagmus [HP:0000639], Hypermetric saccades [HP:0007338], Upbeat nystagmus [HP:0011477], Spastic gait [HP:0002064], Dysarthria [HP:0001260], Progressive gait ataxia [HP:0007240]                                                                                                                                                                                       | Hereditary hemochromatosis (OMIM: 235200)                          | WES                                            | Yes                                                | Primary phenotype*     |
| 170CGS                                    | Sensorineural hearing impairment [HP:0000407], Delayed speech and language development [HP:0000750]                                                                                                                                                                                                                                                                      | Deafness-Infertility Syndrome (OMIM: 611102)                       | Hearing loss panel                             | Yes                                                | Primary phenotype      |
| 183CGS                                    | Esophagitis [HP:0100633], Growth hormone deficiency [HP:0000824], Primary adrenal insufficiency [HP:0008207]                                                                                                                                                                                                                                                             | APECED (OMIM: 240300)                                              | Single Gene Sequencing: AIRE                   | Yes                                                | Primary phenotype      |
| 198CGS                                    | Cutaneous photosensitivity [HP:0000992], Increased erythrocyte protoporphyrin concentration [HP:0012187]                                                                                                                                                                                                                                                                 | Erythropoietic protoporphyria (OMIM: 177000)                       | Porphyria Panel                                | Yes                                                | Primary phenotype      |
| <b>Diagnoses captured by cWGS only</b>    |                                                                                                                                                                                                                                                                                                                                                                          |                                                                    |                                                |                                                    |                        |
| 29CGS                                     | Glucose intolerance [HP:0001952], Chronic recurrent multifocal osteomyelitis [HP:0005901], Pituitary adenoma [HP: 0002893]                                                                                                                                                                                                                                               | Paget disease of bone 3 (OMIM: 167250)                             | MODY Panel                                     | No, gene not included in SOC test                  | Non-primary phenotype  |
| 32CGS                                     | Pituitary adenoma [HP:0002893], Galactorrhea [HP:0100829], Hyperparathyroidism [HP:0000843], Parathyroid adenoma [HP:0002897], Lipoma [HP:0012032], Papillary thyroid carcinoma [HP:0002895], Hyperprolactinemia [HP:0000870], Chronic constipation [HP:0012450]                                                                                                         | ACTH-independent macronodular adrenal hyperplasia 2 (OMIM: 615549) | Custom Breast and Hyperthyroidism Panel        | No, gene not included in SOC test                  | Primary phenotype*     |
|                                           |                                                                                                                                                                                                                                                                                                                                                                          | Glomovenous malformations (OMIM: 138000)                           | Custom Breast and Hyperthyroidism Panel        | No, gene not included in SOC test                  | Non-primary phenotype* |
| 35CGS                                     | Left ventricular hypertrophy [HP:0001712], Aborted Sudden Cardiac Death [HP:0031628], Prolonged QT interval [HP:0001657], Hypertrophic cardiomyopathy [HP:0001639]                                                                                                                                                                                                       | Hypertrophic cardiomyopathy (OMIM: 192600)                         | Hypertrophic Cardiomyopathy Panel              | Yes, variant reported by SOC but classified as VUS | Primary phenotype      |
| 63CGS                                     | Vertigo [HP: 0002321], Urinary urgency [HP:0000012], Ataxia [HP:0001251], Sensory neuropathy [HP:0000763], Limb tremor [HP:02000085], Gait imbalance [HP:0002141], Glucose intolerance [HP:0000833], Abnormality of the adrenal glands [HP:0000834], Constipation [HP:0002019]                                                                                           | Hereditary hemochromatosis (OMIM: 235200)                          | Comprehensive Ataxia Panel; reflex: WES        | Yes, variant analyzed but not reported by SOC      | Primary phenotype*     |
| 65CGS                                     | Delayed speech and language development [HP: 0000750], Behavior abnormality [HP: 0000708], Autistic behavior [HP:0000729], Sleep-wake cycle disturbance [HP:0006979], Developmental regression [HP:0002376]                                                                                                                                                              | Autosomal recessive deafness (OMIM: 220290)                        | Fragile X, Microarray; reflex: Autism ID Panel | No, gene not included in SOC test                  | Primary phenotype*     |
| 80CGS                                     | Vertigo [HP: 0002321], Dysphagia [HP:0002015], Dysarthria [HP:0001260], Ataxia [HP:0001251], Poor fine motor coordination [HP:0007010], Abnormality of the cerebellum [HP:0001317], Gait imbalance [HP:0002141], Cerebellar atrophy [HP:0001272], Iron deficiency anemia [HP:0001891]                                                                                    | Charcot-Marie-Tooth disease type 2A (OMIM: 609260)                 | AD Triplet Repeat Ataxia Panel; reflex: WES    | Yes, variant analyzed but not reported by SOC      | Primary phenotype      |
| 159CGS                                    | Sacral dimple [HP:0000960], Multifocal atrial tachycardia [HP:0011701], Pulmonary hypertension, Laryngeal atresia [HP:0008750], Chronic lung disease [HP:0006528], Osteopenia [HP:0000938], Tracheoesophageal fistula [HP:0002575], Gastroesophageal reflux [HP:0002020], Adrenal insufficiency [HP:0000846], Feeding difficulties [HP:0011968], Cellulitis [HP:0100658] | G6PD deficient hemolytic anemia (favism) (OMIM: 300908)            | Microarray                                     | No, gene not included in SOC test                  | Non-primary phenotype* |
| 169CGS                                    | Hypertension [HP:0000822], Common carotid artery dissection [HP:0012162], Paroxysmal atrial fibrillation [HP:0004757], Obstructive sleep apnea [HP:0002870], Joint hypermobility [HP:0001382], Hypothyroidism [HP:0000821]                                                                                                                                               | Dilated Cardiomyopathy (OMIM: 604145)                              | Aortopathy Panel                               | No, gene not included in SOC test                  | Non-primary phenotype* |
| 170CGS                                    | Sensorineural hearing impairment [HP:0000407], Delayed speech and language development [HP:0000750]                                                                                                                                                                                                                                                                      | Hereditary hemochromatosis (OMIM: 235200)                          | Hearing loss panel                             | No, gene not included in SOC test                  | Family history         |

Table S5. Diagnostic variants reported on cWGS- Technical comparison to SOC. \*While the reported diagnosis had some overlap with a patient phenotype, it was *not* thought to be a compelling explanation for that phenotype and the WGS report was interpreted as "Inconclusive."
